# Supplementary material
Source: HighWire-hosted journal article supplement (https://jnm.snmjournals.org/highwire/filestream/117365/field_highwire_adjunct_files/0/266601_Supplemental_Data.pdf)

**Supplemental Figure 1.** Box and whisker plots illustrating SUV<sub>mean</sub> of background uptake in regions using [<sup>18</sup>F]-FET-βAG-TOCA and [<sup>68</sup>Ga]Ga-DOTA-peptide. Student T-Test was used to assess differences between both tracers. \* denotes p<0.05, \*\* p<0.001.

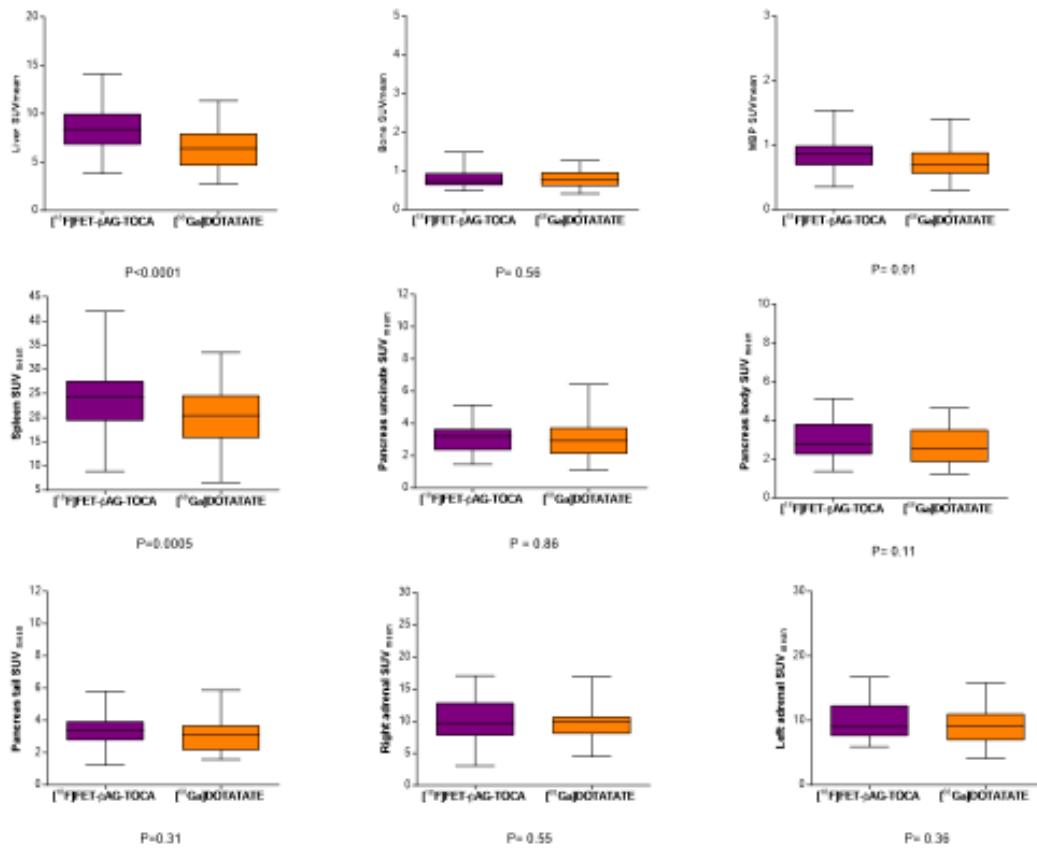

Supplement: 266601_Supplemental_Data.pdf [file 266601_Supplemental_Data.pdf]
